# Supplementary material for: Feasibility of Dynamic Inhaled Gas MRI-Based Measurements Using Acceleration Combined with the Stretched Exponential Model
Source: MDPI journal article supplement (doi:10.3390/diagnostics13030506), 2023-01-30
Supplement: s1 [file s1]

**Table S1.  $^3\text{He}$  MRI-based Fractional-Ventilation Measurements**

| <b>FGRE AF10</b> | $r$       | $r_{\text{sem}}$ | $r^{\text{A}}$ | $r_{\text{sem}}^{\text{A}}$ | $r - r^{\text{A}}$ | $r - r_{\text{sem}}$ | $r_{\text{sem}} - r^{\text{A}}$ | $r^{\text{A}} - r_{\text{sem}}^{\text{A}}$ |
|------------------|-----------|------------------|----------------|-----------------------------|--------------------|----------------------|---------------------------------|--------------------------------------------|
| <b>Rat 1</b>     | 0.22(.03) | 0.21(.01)        | 0.22(.03)      | 0.21(.02)                   | 4%                 | 1%                   | 5%                              | 9%                                         |
| <b>Rat 2</b>     | 0.23(.02) | 0.21(.01)        | 0.23(.02)      | 0.21(.01)                   | 4%                 | 6%                   | 4%                              | 6%                                         |
| <b>Rat 3</b>     | 0.21(.02) | 0.19(.01)        | 0.21(.03)      | 0.19(.01)                   | 4%                 | 5%                   | 4%                              | 5%                                         |
| <b>Rat 4</b>     | 0.21(.02) | 0.19(.01)        | 0.21(.03)      | 0.19(.01)                   | 4%                 | 5%                   | 4%                              | 5%                                         |
| <b>Rat 5</b>     | 0.21(.03) | 0.18(.02)        | 0.21(.03)      | 0.18(.02)                   | 5%                 | 7%                   | 6%                              | 8%                                         |
| <b>FGRE AF14</b> |           |                  |                |                             |                    |                      |                                 |                                            |
| <b>Rat 1</b>     | 0.22(.03) | 0.21(.01)        | 0.22(.03)      | 0.21(.04)                   | 2%                 | 1%                   | 9%                              | 11%                                        |
| <b>Rat 2</b>     | 0.23(.02) | 0.21(.01)        | 0.23(.03)      | 0.21(.03)                   | 7%                 | 6%                   | 6%                              | 6%                                         |
| <b>Rat 3</b>     | 0.21(.02) | 0.19(.01)        | 0.21(.03)      | 0.19(.03)                   | 7%                 | 6%                   | 7%                              | 6%                                         |
| <b>Rat 4</b>     | 0.21(.02) | 0.19(.01)        | 0.21(.03)      | 0.19(.03)                   | 7%                 | 6%                   | 7%                              | 6%                                         |
| <b>Rat 5</b>     | 0.21(.03) | 0.18(.02)        | 0.21(.03)      | 0.18(.02)                   | 6%                 | 7%                   | 8%                              | 7%                                         |
| <b>XC AF10</b>   |           |                  |                |                             |                    |                      |                                 |                                            |
| <b>Rat 1</b>     | 0.22(.03) | 0.21(.01)        | 0.22(.03)      | 0.21(.02)                   | 4%                 | 1%                   | 5%                              | 10%                                        |
| <b>Rat 2</b>     | 0.23(.02) | 0.21(.01)        | 0.23(.02)      | 0.21(.02)                   | 6%                 | 6%                   | 4%                              | 7%                                         |
| <b>Rat 3</b>     | 0.21(.02) | 0.19(.01)        | 0.21(.03)      | 0.19(.02)                   | 4%                 | 6%                   | 4%                              | 6%                                         |
| <b>Rat 4</b>     | 0.21(.02) | 0.19(.01)        | 0.21(.03)      | 0.19(.02)                   | 4%                 | 6%                   | 4%                              | 6%                                         |
| <b>Rat 5</b>     | 0.21(.03) | 0.18(.02)        | 0.21(.03)      | 0.18(.01)                   | 3%                 | 7%                   | 5%                              | 8%                                         |
| <b>XC AF14</b>   |           |                  |                |                             |                    |                      |                                 |                                            |
| <b>Rat 1</b>     | 0.22(.03) | 0.21(.01)        | 0.22(.03)      | 0.21(.02)                   | 3%                 | 1%                   | 5%                              | 10%                                        |
| <b>Rat 2</b>     | 0.23(.02) | 0.21(.01)        | 0.23(.02)      | 0.21(.01)                   | 5%                 | 6%                   | 4%                              | 7%                                         |
| <b>Rat 3</b>     | 0.21(.02) | 0.19(.01)        | 0.21(.02)      | 0.19(.01)                   | 4%                 | 6%                   | 5%                              | 7%                                         |
| <b>Rat 4</b>     | 0.21(.02) | 0.19(.01)        | 0.21(.02)      | 0.19(.01)                   | 4%                 | 6%                   | 5%                              | 7%                                         |
| <b>Rat 5</b>     | 0.21(.03) | 0.18(.02)        | 0.21(.03)      | 0.18(.02)                   | 4%                 | 7%                   | 5%                              | 8%                                         |

$r$  = MRI mean fractional ventilation estimate obtained with the Deninger method using fully-sampled data;  $r_{\text{sem}}$  = MRI mean fractional ventilation estimate obtained with SEM using fully-sampled data;  $r^{\text{A}}$  = MRI mean fractional ventilation estimate obtained with the Deninger method using accelerated data;  $r_{\text{sem}}^{\text{A}}$  = MRI mean fractional ventilation estimate obtained with SEM using accelerated data;  $r - r^{\text{A}}/r - r_{\text{sem}}/r_{\text{sem}} - r^{\text{A}}/r^{\text{A}} - r_{\text{sem}}^{\text{A}}/r^{\text{A}} - r_{\text{sem}}^{\text{A}}/r^{\text{A}} - r_{\text{sem}}^{\text{A}}/r^{\text{A}} =$  pixel-by-pixel deference between the fractional ventilation maps; SEM = stretched exponential model; AF=acceleration factor; FGRE=Fast Gradient Recall Echo; XC=x-Centric.

Table S2. <sup>129</sup>Xe MRI-based Fractional-Ventilation Measurements

| <b>FGRE AF10</b>        | $r$       | $r_{\text{sem}}$ | $r^{\text{A}}$ | $r_{\text{sem}}^{\text{A}}$ | $r - r^{\text{A}}$ | $r - r_{\text{sem}}$ | $r_{\text{sem}} - r^{\text{A}}$ | $r^{\text{A}} - r_{\text{sem}}^{\text{A}}$ |
|-------------------------|-----------|------------------|----------------|-----------------------------|--------------------|----------------------|---------------------------------|--------------------------------------------|
| <b>Rat 1</b>            | 0.25(.02) | 0.24(.02)        | 0.24(.02)      | 0.24(.02)                   | 7%                 | 7%                   | 7%                              | 8%                                         |
| <b>Rat 2</b>            | 0.20(.03) | 0.21(.03)        | 0.20(.02)      | 0.21(.02)                   | 3%                 | 9%                   | 7%                              | 16%                                        |
| <b>Rat 3</b>            | 0.21(.04) | 0.21(.04)        | 0.20(.03)      | 0.21(.03)                   | 4%                 | 9%                   | 8%                              | 14%                                        |
| <b>Rat 4</b>            | 0.22(.02) | 0.22(.02)        | 0.22(.02)      | 0.22(.02)                   | 1%                 | 3%                   | 6%                              | 13%                                        |
| <b>Rat 5</b>            | 0.22(.02) | 0.22(.02)        | 0.22(.02)      | 0.22(.02)                   | 4%                 | 1%                   | 6%                              | 11%                                        |
| <b>Rat 6</b>            | 0.22(.02) | 0.22(.01)        | 0.22(.02)      | 0.22(.02)                   | 7%                 | 8%                   | 7%                              | 12%                                        |
| <b>Rat 7</b>            | 0.21(.03) | 0.21(.02)        | 0.21(.02)      | 0.21(.02)                   | 6%                 | 1%                   | 7%                              | 11%                                        |
| <b><u>FGRE AF14</u></b> |           |                  |                |                             |                    |                      |                                 |                                            |
| <b>Rat 1</b>            | 0.25(.02) | 0.24(.02)        | 0.24(.02)      | 0.24(.02)                   | 13%                | 7%                   | 10%                             | 10%                                        |
| <b>Rat 2</b>            | 0.20(.03) | 0.21(.03)        | 0.20(.03)      | 0.21(.03)                   | 6%                 | 10%                  | 9%                              | 17%                                        |
| <b>Rat 3</b>            | 0.21(.04) | 0.21(.04)        | 0.20(.03)      | 0.20(.03)                   | 7%                 | 9%                   | 9%                              | 14%                                        |
| <b>Rat 4</b>            | 0.22(.02) | 0.22(.02)        | 0.21(.02)      | 0.22(.03)                   | 7%                 | 3%                   | 9%                              | 11%                                        |
| <b>Rat 5</b>            | 0.22(.02) | 0.22(.02)        | 0.22(.02)      | 0.22(.03)                   | 1%                 | .04%                 | 10%                             | 12%                                        |
| <b>Rat 6</b>            | 0.22(.02) | 0.22(.01)        | 0.21(.02)      | 0.22(.02)                   | 8%                 | 6%                   | 10%                             | 13%                                        |
| <b>Rat 7</b>            | 0.21(.03) | 0.21(.02)        | 0.20(.03)      | 0.20(.03)                   | 9%                 | 10%                  | 10%                             | 14%                                        |
| <b><u>XC AF10</u></b>   |           |                  |                |                             |                    |                      |                                 |                                            |
| <b>Rat 1</b>            | 0.25(.02) | 0.24(.02)        | 0.24(.02)      | 0.24(.02)                   | 6%                 | 7%                   | 7%                              | 9%                                         |
| <b>Rat 2</b>            | 0.20(.03) | 0.21(.03)        | 0.20(.03)      | 0.21(.03)                   | 5%                 | 9%                   | 8%                              | 17%                                        |
| <b>Rat 3</b>            | 0.21(.04) | 0.21(.04)        | 0.20(.03)      | 0.20(.03)                   | 4%                 | 9%                   | 6%                              | 15%                                        |
| <b>Rat 4</b>            | 0.22(.02) | 0.22(.02)        | 0.21(.02)      | 0.22(.03)                   | 8%                 | 3%                   | 8%                              | 13%                                        |
| <b>Rat 5</b>            | 0.22(.02) | 0.22(.02)        | 0.22(.02)      | 0.22(.03)                   | 5%                 | .03%                 | 7%                              | 13%                                        |
| <b>Rat 6</b>            | 0.22(.02) | 0.22(.01)        | 0.21(.02)      | 0.22(.02)                   | 4%                 | 6%                   | 7%                              | 12%                                        |
| <b>Rat 7</b>            | 0.21(.03) | 0.21(.02)        | 0.20(.03)      | 0.20(.03)                   | 8%                 | 10%                  | 9%                              | 13%                                        |
| <b><u>XC AF14</u></b>   |           |                  |                |                             |                    |                      |                                 |                                            |
| <b>Rat 1</b>            | 0.25(.02) | 0.24(.02)        | 0.24(.02)      | 0.24(.02)                   | 7%                 | 7%                   | 7%                              | 9%                                         |
| <b>Rat 2</b>            | 0.20(.03) | 0.21(.03)        | 0.20(.02)      | 0.20(.02)                   | 4%                 | 9%                   | 9%                              | 16%                                        |
| <b>Rat 3</b>            | 0.21(.04) | 0.21(.04)        | 0.20(.03)      | 0.20(.03)                   | 5%                 | 9%                   | 8%                              | 13%                                        |
| <b>Rat 4</b>            | 0.22(.02) | 0.22(.02)        | 0.21(.02)      | 0.22(.02)                   | 7%                 | 3%                   | 7%                              | 13%                                        |
| <b>Rat 5</b>            | 0.22(.02) | 0.22(.02)        | 0.21(.02)      | 0.21(.02)                   | .02%               | .06%                 | 7%                              | 12%                                        |
| <b>Rat 6</b>            | 0.22(.02) | 0.22(.01)        | 0.21(.02)      | 0.21(.02)                   | 5%                 | 6%                   | 8%                              | 13%                                        |
| <b>Rat 7</b>            | 0.21(.03) | 0.21(.02)        | 0.20(.02)      | 0.20(.02)                   | 7%                 | 10%                  | 9%                              | 13%                                        |

$r$  = MRI mean fractional ventilation estimate obtained with the Deninger method using fully-sampled data;  $r_{\text{sem}}$  = MRI mean fractional ventilation estimate obtained with SEM using fully-sampled data;  $r^{\text{A}}$  = MRI mean fractional ventilation estimate obtained with the Deninger method using accelerated data;  $r_{\text{sem}}^{\text{A}}$  = MRI mean fractional ventilation estimate obtained with SEM using accelerated data;  $r - r^{\text{A}}/r - r_{\text{sem}}/r_{\text{sem}} - r^{\text{A}}/r^{\text{A}} - r_{\text{sem}}^{\text{A}}/r^{\text{A}} - r_{\text{sem}}^{\text{A}}/r^{\text{A}} =$  pixel-by-pixel difference between the fractional ventilation maps; SEM = stretched exponential model; AF=acceleration factor; FGRE=Fast Gradient Recall Echo; XC=x-Centric.

**Table S3. <sup>19</sup>F MRI-based Fractional-Ventilation Measurements**

| <b>FGRE AF10</b>        | <b><i>r</i></b> | <b><i>r</i><sub>sem</sub></b> | <b><i>r</i><sup>A</sup></b> | <b><i>r</i><sub>sem</sub><sup>A</sup></b> | <b><i>r</i> - <i>r</i><sup>A</sup></b> | <b><i>r</i> - <i>r</i><sub>sem</sub></b> | <b><i>r</i><sub>sem</sub> - <i>r</i><sup>A</sup></b> | <b><i>r</i><sup>A</sup> - <i>r</i><sub>sem</sub><sup>A</sup></b> |
|-------------------------|-----------------|-------------------------------|-----------------------------|-------------------------------------------|----------------------------------------|------------------------------------------|------------------------------------------------------|------------------------------------------------------------------|
| <b>Rat 1</b>            | 0.26(.04)       | 0.25(.09)                     | 0.24(.02)                   | 0.24(.10)                                 | 5%                                     | 13%                                      | 9%                                                   | 11%                                                              |
| <b>Rat 2</b>            | 0.26(.05)       | 0.25(.09)                     | 0.23(.03)                   | 0.24(.06)                                 | 18%                                    | 16%                                      | 14%                                                  | 15%                                                              |
| <b>Rat 3</b>            | 0.23(.05)       | 0.23(.08)                     | 0.21(.04)                   | 0.21(.06)                                 | 4%                                     | 16%                                      | 13%                                                  | 18%                                                              |
| <b>Rat 4</b>            | 0.19(.07)       | 0.20(.09)                     | 0.16(.05)                   | 0.17(.06)                                 | 6%                                     | 19%                                      | 17%                                                  | 87%                                                              |
| <b>Rat 5</b>            | 0.07(.05)       | 0.09(.07)                     | 0.04(.02)                   | 0.03(.02)                                 | 36%                                    | 15%                                      | 38%                                                  | 50%                                                              |
| <b>Rat 6</b>            | 0.26(.04)       | 0.25(.09)                     | 0.24(.02)                   | 0.24(.10)                                 | 5%                                     | 13%                                      | 9%                                                   | 11%                                                              |
| <b><u>FGRE AF14</u></b> |                 |                               |                             |                                           |                                        |                                          |                                                      |                                                                  |
| <b>Rat 1</b>            | 0.26(.04)       | 0.25(.09)                     | 0.24(.03)                   | 0.24(.10)                                 | 10%                                    | 13%                                      | 10%                                                  | 12%                                                              |
| <b>Rat 2</b>            | 0.26(.05)       | 0.25(.09)                     | 0.22(.04)                   | 0.24(.09)                                 | 21%                                    | 16%                                      | 16%                                                  | 13%                                                              |
| <b>Rat 3</b>            | 0.23(.05)       | 0.23(.08)                     | 0.20(.04)                   | 0.21(.09)                                 | 8%                                     | 16%                                      | 18%                                                  | 10%                                                              |
| <b>Rat 4</b>            | 0.19(.07)       | 0.20(.09)                     | 0.16(.05)                   | 0.19(.09)                                 | 10%                                    | 20%                                      | 15%                                                  | 4%                                                               |
| <b>Rat 5</b>            | 0.07(.05)       | 0.09(.07)                     | 0.04(.02)                   | 0.02(.02)                                 | 35%                                    | 9%                                       | 20%                                                  | 135%                                                             |
| <b>Rat 6</b>            | 0.26(.04)       | 0.25(.09)                     | 0.24(.03)                   | 0.24(.10)                                 | 10%                                    | 12%                                      | 10%                                                  | 12%                                                              |
| <b><u>XC AF10</u></b>   |                 |                               |                             |                                           |                                        |                                          |                                                      |                                                                  |
| <b>Rat 1</b>            | 0.26(.04)       | 0.25(.09)                     | 0.24(.02)                   | 0.23(.08)                                 | 6%                                     | 13%                                      | 10%                                                  | 12%                                                              |
| <b>Rat 2</b>            | 0.26(.05)       | 0.25(.09)                     | 0.22(.04)                   | 0.23(.05)                                 | 17%                                    | 15%                                      | 16%                                                  | 11%                                                              |
| <b>Rat 3</b>            | 0.23(.05)       | 0.23(.08)                     | 0.20(.04)                   | 0.21(.07)                                 | 7%                                     | 16%                                      | 16%                                                  | 17%                                                              |
| <b>Rat 4</b>            | 0.19(.07)       | 0.20(.09)                     | 0.15(.05)                   | 0.18(.09)                                 | 9%                                     | 19%                                      | 17%                                                  | 11%                                                              |
| <b>Rat 5</b>            | 0.07(.05)       | 0.09(.07)                     | 0.04(.03)                   | 0.03(.03)                                 | 37%                                    | 15%                                      | 6%                                                   | 206%                                                             |
| <b>Rat 6</b>            | 0.26(.04)       | 0.25(.09)                     | 0.24(.02)                   | 0.24(.08)                                 | 6%                                     | 13%                                      | 10%                                                  | 11%                                                              |
| <b><u>XC AF14</u></b>   |                 |                               |                             |                                           |                                        |                                          |                                                      |                                                                  |
| <b>Rat 1</b>            | 0.26(.04)       | 0.25(.09)                     | 0.24(.02)                   | 0.24(.08)                                 | 7%                                     | 13%                                      | 11%                                                  | 13%                                                              |
| <b>Rat 2</b>            | 0.26(.05)       | 0.25(.09)                     | 0.22(.04)                   | 0.23(.06)                                 | 20%                                    | 15%                                      | 17%                                                  | 11%                                                              |
| <b>Rat 3</b>            | 0.23(.05)       | 0.23(.08)                     | 0.20(.04)                   | 0.21(.08)                                 | 6%                                     | 16%                                      | 16%                                                  | 20%                                                              |
| <b>Rat 4</b>            | 0.19(.07)       | 0.20(.09)                     | 0.15(.05)                   | 0.18(.10)                                 | 5%                                     | 19%                                      | 18%                                                  | 14%                                                              |
| <b>Rat 5</b>            | 0.07(.05)       | 0.09(.07)                     | 0.04(.03)                   | 0.03(.03)                                 | 35%                                    | 20%                                      | .06%                                                 | 133%                                                             |
| <b>Rat 6</b>            | 0.26(.04)       | 0.25(.09)                     | 0.24(.02)                   | 0.24(.08)                                 | 7%                                     | 13%                                      | 11%                                                  | 13%                                                              |

*r* = MRI mean fractional ventilation estimate obtained with the Deninger method using fully-sampled data; *r*<sub>sem</sub> = MRI mean fractional ventilation estimate obtained with SEM using fully-sampled data; *r*<sup>A</sup> = MRI mean fractional ventilation estimate obtained with the Deninger method using accelerated data; *r*<sub>sem</sub><sup>A</sup> = MRI mean fractional ventilation estimate obtained with SEM using accelerated data; *r* - *r*<sup>A</sup>/*r* - *r*<sub>sem</sub>/*r*<sub>sem</sub> - *r*<sup>A</sup>/*r*<sup>A</sup> - *r*<sub>sem</sub><sup>A</sup>/ = pixel-by-pixel deference between the fractional ventilation maps; SEM = stretched exponential model; AF=acceleration factor; FGRE=Fast Gradient Recall Echo; XC=x-Centric. The first two columns of Table show the *r* values obtained for AF=1 with SEM and Denninger method.

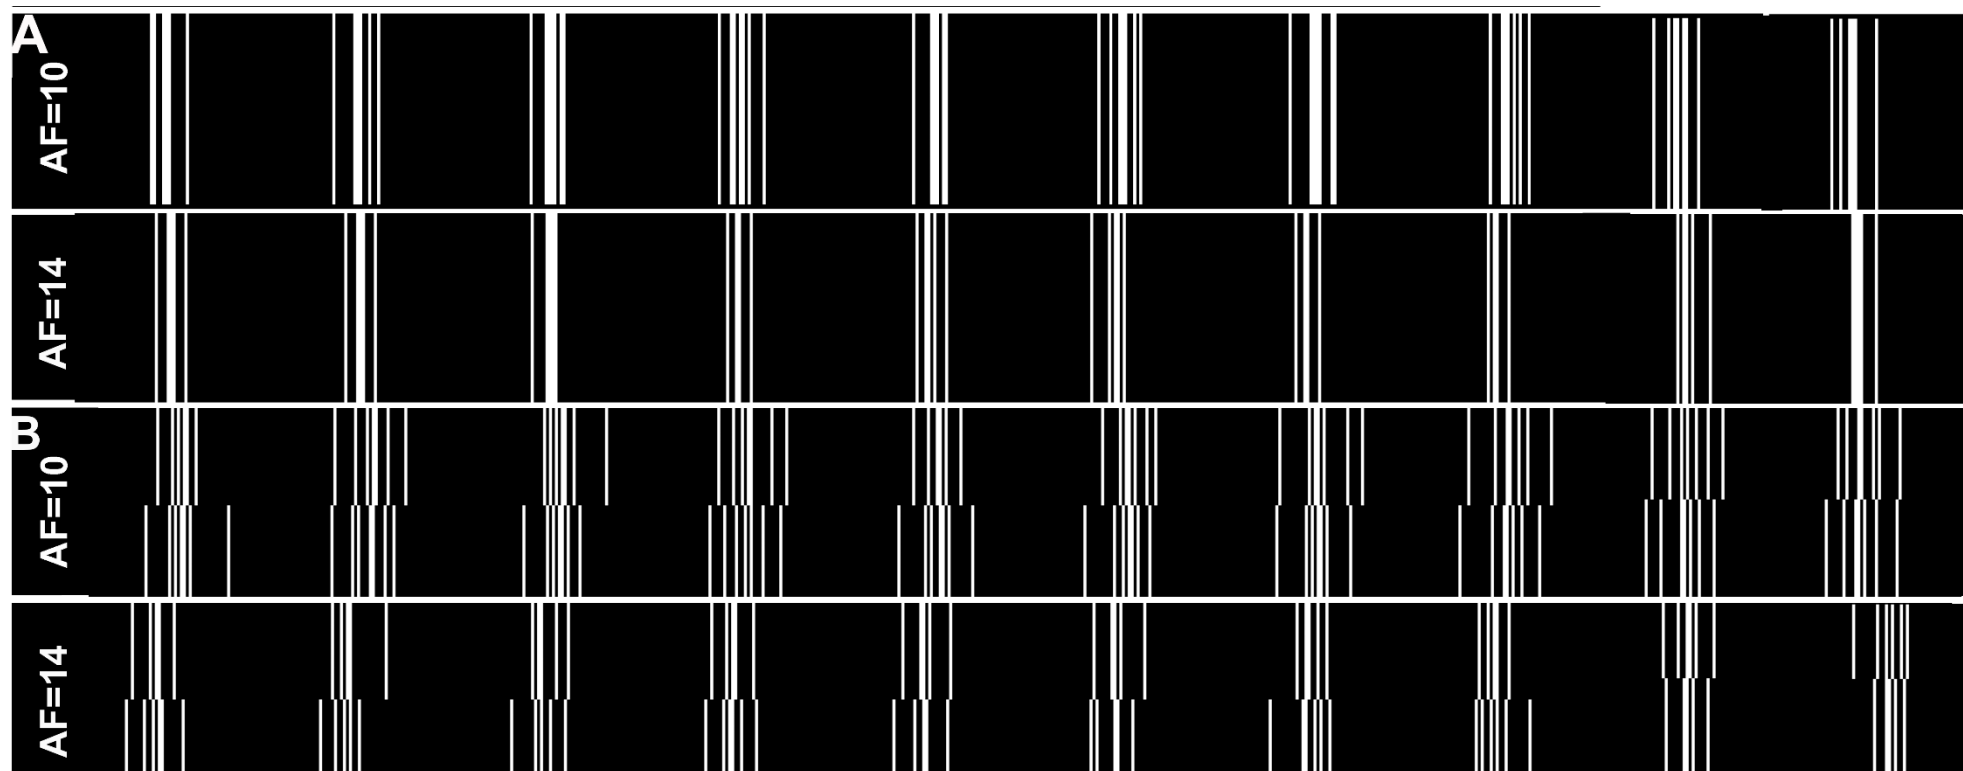

Figure S1. k-space under-sampling in the phase encoding direction (fully sampled in the x-direction) schemes, ensuring a variety of sparsity patterns for each wash-out  $^{19}\text{F}$  image is depicted by A) AF=10 and AF=14 obtained for FGRE and B) AF=10 and AF=14 obtained for x-Centric that were retrospectively applied in wash-out direction. No undersampling in the x-direction was used for FGRE while 50% under-sampling (compensated by doubling the lines in the phase encoding direction) was employed for x-Centric.
